# Supplementary material for: Iodine supplementation of lactating women and assessment of infant visual information processing and maternal and infant thyroid function: A randomized trial
Source: PubMed Central journal article supplement (PMC6779247; doi:10.1371/journal.pone.0223348), 2019-10-07
Supplement: pone.0223348.s003.pdf [file pone.0223348.s003.pdf]

## S1 Dataset. Data.

| Group | Sub code | M_age | M_Wt0 | M_Ht0 | M_MUAC0 | Goiter0 | MUIC_0 | M_Tg0 |
|-------|----------|-------|-------|-------|---------|---------|--------|-------|
| 1     | 1        | 24    |       | 170.2 | 25.2    | 0       | 307.2  | 5.2   |
| 1     | 2        | 23    |       | 157   | 24      | 0       | 162.2  | 1.6   |
| 1     | 3        | 22    |       | 159.9 | 26      | 0       | 183.1  | 1.4   |
| 1     | 4        | 20    | 56    | 153.8 | 25.3    | 0       | 81.6   | 9.7   |
| 1     | 5        | 20    | 45    | 150.7 | 22.1    | 0       | 106.8  | 1.8   |
| 1     | 6        | 20    | 52.8  | 167.4 | 20.3    | 2       | 57.6   | 3.6   |
| 1     | 7        | 23    | 47    | 151.7 | 23.2    | 2       | 89.7   | 0.1   |
| 1     | 8        | 20    | 48.4  | 156.3 | 22.9    | 2       | 153.7  | 7.5   |
| 1     | 9        | 32    | 56.2  | 166.9 | 24.5    | 0       | 28.8   | 28.1  |
| 1     | 10       | 27    | 62.1  | 156.5 | 24.8    | 2       | 94.2   | 6     |
| 1     | 11       | 26    | 54.5  | 157   | 22      | 2       | 164.6  | 14.1  |
| 1     | 12       | 20    | 64.4  | 161.2 | 25      | 1       | 149.9  | 11.5  |
| 1     | 13       | 22    | 45.9  | 155   | 23.5    | 2       | 60.1   | 11    |
| 1     | 14       | 20    | 48.3  | 154.3 | 22.1    | 2       | 116.9  | 12.1  |
| 1     | 15       | 23    | 48.2  | 161.1 | 21.7    | 2       | 84     | 9.1   |
| 1     | 16       | 30    | 53.8  | 158.5 | 25.5    | 1       | 252.3  | 1.2   |
| 1     | 17       | 18    | 52.7  | 156.5 | 21.5    | 1       | 147.2  | 3     |
| 1     | 18       | 21    | 47.5  | 158.7 | 21.5    | 2       | 164.7  | 3.6   |
| 1     | 19       | 24    | 84.3  | 171.6 | 28.3    | 0       | 26.4   | 27.3  |
| 1     | 20       | 30    | 52.6  | 155.2 | 22.3    | 1       | 76     | 7.6   |
| 1     | 22       | 22    | 55    | 163.2 | 24.4    | 0       | 182.2  | 1.3   |
| 1     | 23       | 36    | 60    | 152   | 26.5    | 2       | 120.3  | 12.6  |
| 1     | 24       | 24    | 52.6  | 153.6 | 24.4    | 2       | 147.7  | 0.7   |
| 1     | 25       | 27    | 54.8  | 159.3 | 23      | 2       | 81.6   | 3.9   |
| 1     | 26       | 20    | 47.6  | 161.2 | 22      | 0       | 82.4   | 4.2   |
| 1     | 27       | 20    | 46.6  | 168.2 | 20.5    | 1       | 213.1  | 2.8   |
| 1     | 28       | 35    | 72.5  | 169.2 | 27      | 2       | 192.6  | 1.4   |
| 1     | 29       | 22    | 50.1  | 160.9 | 20.6    | 2       | 74.5   | 1.1   |
| 1     | 30       | 20    | 52.2  | 148.5 | 23      | 1       | 67     | 4.1   |
| 1     | 31       | 20    | 52.6  | 155.5 | 23.6    | 1       | 129.8  | 4.3   |
| 1     | 32       | 22    | 47.1  | 165.5 | 21      | 0       | 99.4   | 0.6   |
| 1     | 33       | 28    | 54.8  | 151   | 23.4    | 2       | 725.2  | 7.5   |
| 1     | 34       | 18    | 48.8  | 154.8 | 22.2    | 2       | 170.7  | 7.2   |
| 1     | 35       | 23    | 56.6  | 160   | 23.3    | 1       | 156.3  | 4.7   |
| 1     | 36       | 21    | 61    | 164.2 | 24.9    | 2       | 33.6   | 11.6  |
| 1     | 37       | 30    | 49.1  | 162.2 | 22.3    | 0       | 204.3  | 4.4   |
| 1     | 38       | 20    | 55    | 154.4 | 23.9    | 2       | 142.7  | 26.3  |
| 1     | 39       | 23    | 56    | 162.2 | 23.1    | 1       | 93.2   | 11.5  |
| 1     | 40       | 25    | 57.6  | 175.2 | 22.4    | 2       | 177.9  | 1.3   |
| 1     | 41       | 28    | 46.6  | 152.8 | 21.7    | 1       | 35.2   | 0.5   |
| 1     | 42       | 26    | 45.2  | 155.6 | 20.9    | 1       | 75.4   | 0.2   |
| 1     | 43       | 18    | 48.6  | 158.4 | 21.8    | 2       | 35.6   | 48.7  |
| 1     | 44       | 28    | 57.6  | 158.2 | 23.7    | 2       | 186.3  | 26.8  |
| 1     | 45       | 29    | 50.4  | 166.4 | 22      | 2       | 229.5  | 5.5   |
| 1     | 46       | 20    | 49.6  | 156.8 | 21.5    | 2       | 66.4   | 3.6   |

|   |     |    |      |       |      |   |       |      |
|---|-----|----|------|-------|------|---|-------|------|
| 1 | 47  | 20 | 47.6 | 154.2 | 20.6 | 0 | 163.2 | 1.3  |
| 1 | 48  | 21 | 52.6 | 165.3 | 22   | 2 | 56.5  | 1.2  |
| 1 | 49  | 24 | 59.8 | 162.2 | 24   | 2 | 151.1 | 1.4  |
| 1 | 50  | 32 | 51.6 | 156   | 22.8 | 2 | 197   | 1.5  |
| 1 | 500 | 25 | 58.8 | 158.4 | 24.3 | 2 | 143.7 | 1.5  |
| 2 | 51  | 25 | 53   | 157.6 | 22   | 0 | 70.6  | 1.4  |
| 2 | 52  | 30 | 51.8 | 156.3 | 22.3 | 2 | 85.7  | 2.7  |
| 2 | 53  | 20 | 58.6 | 158.4 | 23.5 | 2 | 104.3 | 4.7  |
| 2 | 54  | 23 | 40   | 150.2 | 19.3 | 1 | 50.5  | 1.2  |
| 2 | 55  | 29 | 51   | 155.8 | 25   | 1 | 82.4  | 0.1  |
| 2 | 56  | 25 | 57   | 157   | 26   | 2 | 96    | 2.2  |
| 2 | 57  | 28 | 46   | 145   | 21.9 | 2 | 123.5 | 7.9  |
| 2 | 58  | 26 |      | 155.6 | 24.5 | 0 | 205.1 | 4.1  |
| 2 | 59  | 20 | 64.8 | 158.2 | 25.6 | 0 | 194.6 | 20.5 |
| 2 | 60  | 20 | 43.6 | 143.4 | 23   | 0 | 79.3  | 1.4  |
| 2 | 61  | 24 | 48.2 | 153   | 23.5 | 2 | 109.8 | 1.2  |
| 2 | 62  | 20 |      | 157.8 | 22.5 | 2 | 141.2 | 1.4  |
| 2 | 63  | 23 | 53.4 | 155.4 | 25   | 2 | 109.9 | 87   |
| 2 | 64  | 20 | 55.4 | 153.5 | 23.4 | 2 | 62.1  | 3.3  |
| 2 | 65  | 20 | 55.5 | 162.9 | 23   | 0 | 63.5  | 2.3  |
| 2 | 66  | 20 | 54.3 | 159.7 | 23   | 2 | 134.9 | 1.1  |
| 2 | 67  | 20 | 50.8 | 162.9 | 20.5 | 2 | 181.7 | 64.8 |
| 2 | 68  | 20 | 56.3 | 161.2 | 22.7 | 2 | 103.6 | 11.4 |
| 2 | 69  | 20 | 43.5 | 148.2 | 23.8 | 2 | 70.8  | 1.1  |
| 2 | 70  | 25 | 55   | 158.5 | 22.8 | 0 | 84    | 3.7  |
| 2 | 71  | 25 | 55   | 159.5 | 23.4 | 1 | 131.6 | 3    |
| 2 | 72  | 25 | 54.8 | 157.8 | 24   | 2 | 158.7 | 3.2  |
| 2 | 73  | 28 | 42.7 | 148   | 19.7 | 0 | 62.2  | 1.4  |
| 2 | 74  | 25 | 52.9 | 170   | 22.5 | 2 | 70.7  | 30.6 |
| 2 | 75  | 20 | 67.6 | 158.4 | 27.4 | 2 | 95    | 18.7 |
| 2 | 76  | 21 | 54.5 | 157.8 | 24.6 | 0 | 365.1 | 1.4  |
| 2 | 77  | 25 | 48.5 | 148.9 | 23.1 | 1 | 149.7 | 15   |
| 2 | 78  | 25 | 51.5 | 163   | 22.5 | 2 | 40.8  | 1.7  |
| 2 | 79  | 25 | 54.2 | 159.1 | 24.5 | 1 | 148.7 | 85.2 |
| 2 | 80  | 19 | 49.6 | 157   | 21   | 1 | 45.7  | 11.6 |
| 2 | 81  | 22 | 45.6 | 140.7 | 23.3 | 0 | 123.5 | 2.6  |
| 2 | 82  | 22 | 59   | 165   | 21.6 | 0 | 85    | 4.5  |
| 2 | 83  | 21 | 56.1 | 155.7 | 24   | 1 | 90    | 4.8  |
| 2 | 84  | 25 | 59.4 | 160.5 | 24.4 | 0 | 184   | 9.5  |
| 2 | 85  | 20 | 60.6 | 164.4 | 22.3 | 2 | 71.8  | 24   |
| 2 | 86  | 20 | 53.4 | 145.8 | 24   | 1 | 86    | 6.4  |
| 2 | 87  | 16 | 51.1 | 158.6 | 23.5 | 1 | 53    | 2.3  |
| 2 | 88  | 24 | 56.2 | 163   | 21.5 | 0 | 174.5 | 14.3 |
| 2 | 89  | 19 |      | 161.3 | 22.4 | 2 | 71.4  | 4    |
| 2 | 90  | 30 |      | 162.5 | 26.9 | 2 | 39.1  | 5.4  |
| 2 | 91  | 20 | 59   | 165.7 | 23.3 | 2 | 141.9 | 11.9 |
| 2 | 92  | 33 | 64.6 | 157.3 | 24.8 | 2 | 36.6  | 3.4  |

|   |     |    |      |       |      |   |       |       |
|---|-----|----|------|-------|------|---|-------|-------|
| 2 | 93  | 20 | 52.4 | 163.5 | 23.3 | 1 | 57.7  | 11.9  |
| 2 | 94  | 18 | 50.6 | 161   | 23   | 2 | 301.9 | 9.5   |
| 2 | 95  | 20 | 64.4 | 160.8 | 23.5 | 2 | 160   | 311.7 |
| 2 | 96  | 22 | 53.8 | 149.8 | 23.8 | 2 | 62.5  | 24.1  |
| 2 | 97  | 19 | 59.2 | 157.5 | 26.4 | 0 | 169.4 | 4     |
| 2 | 98  | 18 | 57.4 | 160.6 | 24   | 2 | 116.2 | 34.3  |
| 2 | 99  | 21 | 43.6 | 148.3 | 24.8 | 2 | 34.7  | 7.2   |
| 2 | 100 | 23 | 47.6 | 152   | 19.7 | 1 | 137.7 | 3.6   |
| 2 | 501 | 19 | 58.8 | 158.6 | 23.9 | 1 | 46.5  | 6.4   |

| M_T30 | M_T40 | M_TSH0 | BMIC_0 | Child_age | C_Wt0 | C_length0 | UIC_CO | Mgoiter6 |
|-------|-------|--------|--------|-----------|-------|-----------|--------|----------|
| 0.76  | 3.6   | 5.28   | 157.27 | 9         | 4.5   | 54        | 265.7  | 0        |
| 1.45  | 6.71  | 6.09   | 36.75  | 2         | 2.6   | 44.5      | 130.8  | 0        |
| 1.26  | 6.3   | 2.59   | 495.73 | 4         | 3.3   | 48        | 292.9  | 0        |
| 1.46  | 5.95  | 3.96   | 11.26  | 3         | 2.9   | 49.5      | 417.4  | 0        |
| 1.05  | 4.61  | 6.29   | 18.23  | 10        | 3.5   | 50.1      | 85.3   | 0        |
| 2.06  | 7.76  | 1.58   | 10.8   | 4         | 2.4   | 48        | 400.6  | 0        |
| 1.28  | 10.35 | 5.28   | 20.36  | 9         | 3.5   | 52        | 89     | 0        |
| 1.03  | 6.47  | 2.92   | 15.68  | 9         | 3.8   | 53        | 310    | 0        |
| 1.28  | 5.89  | 5.55   | 7.78   | 8         | 2.7   | 53        | 256.1  | 0        |
| 0.79  | 4.29  | 0.07   | 36.65  | 6         | 4.9   | 55        | 141.4  | 0        |
| 0.88  | 5.24  | 4.35   | 10.27  | 5         | 3.2   | 48        | 221    | 1        |
| 1.34  | 5.99  | 1.74   | 24.91  | 8         | 3.5   | 48        | 85.8   | 1        |
| 1.14  | 5.14  | 0.51   | 8.11   | 6         | 3.8   | 52.5      | 86.7   | 1        |
| 1.33  | 8.08  | 4.87   | 74.98  | 3         | 2.9   | 49.5      | 616.1  | 1        |
| 1.87  | 9.12  | 1.36   | 19.09  | 3         | 3.6   | 51        | 169.1  | 1        |
| 0.57  | 6.04  | 5.99   | 146.34 | 8         | 4.3   | 53        | 110.8  | 0        |
| 1.97  | 9.85  | 6.35   | 344.93 | 6         | 3.1   | 47        | 307.7  | 0        |
| 0.99  | 7.22  | 1.05   | 192.58 | 6         | 3.2   | 52.2      | 372.2  | 1        |
| 1.03  | 7.7   | 1.92   | 130.57 | 6         | 3.8   | 54.7      | 92.4   | 0        |
| 1.04  | 8.6   | 0.23   | 117.07 | 5         | 3.9   | 51        | 131.6  | 0        |
| 1.07  | 6.38  | 3.03   | 263.89 | 8         | 3.2   | 52.5      | 397.5  | 0        |
| 1.28  | 10.72 | 1.43   | 131.76 | 3         | 3.2   | 48.5      | 1037   | 1        |
| 2.81  | 6.63  | 2.7    | 199.91 | 7         | 2.9   | 49        | 172.3  | 1        |
| 1.68  | 7.22  | 3.36   | 334.79 | 3         | 3.4   | 50.5      | 326.4  | 0        |
| 1.83  | 7.69  | 11.46  | 272.07 | 2         | 2.9   | 46        | 1113   | 0        |
| 1.28  | 7.81  | 7.49   | 111.03 | 3         | 2.3   | 45        | 106    | 1        |
| 1.19  | 6.97  | 1.09   | 203.76 | 5         | 3.6   | 50.7      | 218.7  | 0        |
| 1.07  | 10.87 | 3.79   | 150.78 | 5         | 2.5   | 49.8      | 59.3   | 1        |
| 1.3   | 22.2  | 3.71   | 81.54  | 4         | 3.2   | 49.6      | 138.2  | 0        |
| 1.47  | 10.12 | 0.35   | 219.18 | 7         | 3.5   | 50        | 285.8  | 1        |
| 2.38  | 6.54  | 4.66   | 69.83  | 5         | 3.7   | 51        | 68.9   | 0        |
| 2.04  | 6.57  | 4.24   | 331.42 | 3         | 2.6   | 45.8      | 2878.9 | 0        |
| 1.35  | 8.14  | 0.66   | 164.98 | 4         | 3.7   | 52.5      | 159.9  | 1        |
| 1     | 7.17  | 1.92   | 164.98 | 3         | 2.9   | 49.9      | 299    | 0        |
| 1.13  | 7.85  | 0.78   | 264.38 | 8         | 4     | 53.5      | 417.8  | 1        |
| 1.2   | 7.05  | 0.07   | 283.15 | 6         | 3.5   | 51        | 218.2  | 0        |
| 1.26  | 8.35  | 1.05   | 476.46 | 4         | 3     | 48.5      | 497    | 0        |
| 2.09  | 12.28 | 0.07   | 146.99 | 4         | 2.9   | 46        | 103.1  | 0        |
| 1.92  | 9.62  | 1.05   | 174.75 | 5         | 3.1   | 50        | 906.1  | 0        |
| 1.03  | 5.24  | 1.2    | 137.85 | 8         | 3.5   | 50.5      | 246    | 0        |
| 0.68  | 7.63  | 1.2    | 467.65 | 9         | 2     | 44.8      | 449.7  | 0        |
| 0.82  | 5.65  | 4.17   | 105.93 | 3         | 2.9   | 48.5      | 102.4  | 1        |
| 1.21  | 7.16  | 1.13   | 422.58 | 4         | 3     | 51        | 284    | 0        |
| 1.34  | 6.37  | 0.51   | 474.87 | 3         | 2.6   | 47        | 336.9  | 0        |
| 1.69  | 5.42  | 6.19   | 158.88 | 4         | 2     | 46        | 87.3   | 0        |

|      |       |      |        |    |     |      |        |   |
|------|-------|------|--------|----|-----|------|--------|---|
| 1.62 | 5.99  | 3.43 | 472.74 | 6  | 3.4 | 50.5 | 1203.5 | 0 |
| 0.75 | 5.06  | 1.2  | 49.5   | 9  | 4.3 | 56.5 | 123.9  | 0 |
| 0.78 | 6.98  | 0.47 | 163.95 | 5  | 3.1 | 47.8 | 194.9  | 0 |
| 1.77 | 4.93  | 2.89 | 421.4  | 2  | 3.4 | 48.5 | 182.4  | 1 |
| 1.7  | 5.86  | 3.61 | 97.59  | 2  | 2.9 | 46.4 | 368.4  | 0 |
| 1.72 | 6.09  | 1.89 | 158.62 | 7  | 3.1 | 49.7 | 160.3  | 0 |
| 1.3  | 6.3   | 3.21 | 445.4  | 2  | 3   | 50.5 | 103.9  | 0 |
| 1.16 | 5.19  | 6.55 | 163.12 | 6  | 3.1 | 51.3 | 290.9  | 0 |
| 2.25 | 7.69  | 0.43 | 101.04 | 9  | 2.6 | 47   | 43.1   | 0 |
| 1.13 | 5.33  | 1.55 | 143.7  | 9  | 3.8 | 53   | 109.1  | 1 |
| 1.21 | 5.73  | 1.85 | 185.53 | 8  | 4   | 51   | 106.4  | 1 |
| 1.52 | 5.5   | 1.55 | 380.7  | 7  | 2.4 | 44.4 | 302.5  | 1 |
| 0.76 | 4.3   | 3.28 | 94.02  | 8  | 4.9 | 57.5 | 111.1  | 0 |
| 1.41 | 6.91  | 0.27 | 255.52 | 7  | 3.1 | 51   | 289.5  | 0 |
| 1.39 | 9.75  | 3.71 | 219.86 | 7  | 2.1 | 44.5 | 160    | 0 |
| 1.16 | 5.85  | 0.55 | 153.78 | 7  | 3.3 | 54   | 238.6  | 0 |
| 0.82 | 4.72  | 0.58 | 147.58 | 8  | 3.5 | 52   | 156    | 1 |
| 1.17 | 5.14  | 0.28 | 337.85 | 9  | 3.7 | 50.5 | 39     | 1 |
| 1.74 | 7.23  | 0.86 | 242.57 | 4  | 2.2 | 47   | 363.6  | 1 |
| 1.83 | 7.09  | 1.81 | 225.32 | 2  | 2.5 | 46   | 331.4  | 0 |
| 1.18 | 8.37  | 0.78 | 90.64  | 9  | 3.5 | 52   | 65.1   | 1 |
| 1.21 | 6.39  | 0.26 | 163.65 | 6  | 4.3 | 52.5 | 262.2  | 1 |
| 1.25 | 5.27  | 3.03 | 128.28 | 5  | 3.3 | 49.5 | 65.9   | 1 |
| 1.26 | 5.2   | 0.93 | 123.95 | 9  | 3.6 | 52   | 107.2  | 1 |
| 1.22 | 6.83  | 1.05 | 118.47 | 5  | 3.7 | 54   | 115    | 0 |
| 1.29 | 6.55  | 3.03 | 200.25 | 4  | 3.8 | 51.5 | 393.6  | 1 |
| 1.99 | 8.24  | 3.68 | 218.22 | 5  | 2.6 | 46.5 | 316.3  | 1 |
| 1.48 | 5.43  | 2.74 | 198.35 | 7  | 3.2 | 51.3 | 295.4  | 0 |
| 1.33 | 7.69  | 0.7  | 9.56   | 10 | 3.5 | 52   | 107.6  | 1 |
| 0.77 | 5.38  | 0.31 | 8.54   | 10 | 3.8 | 52.5 | 95.3   | 1 |
| 1.38 | 7.96  | 0.86 | 28.46  | 6  | 2.8 | 49.2 | 687.9  | 0 |
| 1.62 | 7.83  | 0.26 | 21.16  | 7  | 3.3 | 50.5 | 435.8  | 0 |
| 1.96 | 7.57  | 0.39 | 19.31  | 3  | 3.4 | 49   | 206.7  | 0 |
| 1.83 | 6.49  | 0.03 | 82.43  | 4  | 1.5 | 41.5 | 464    | 0 |
| 1.48 | 6.46  | 2.92 | 16.5   | 5  | 3.2 | 51   | 89.4   | 0 |
| 1.03 | 4.89  | 4.52 | 22.5   | 3  | 3.5 | 52.1 | 347.7  | 0 |
| 0.68 | 5.15  | 3.86 | 19.35  | 5  | 3.3 | 47.8 | 75.5   | 0 |
| 1.52 | 5.13  | 3.1  | 18.9   | 7  | 4   | 50.4 | 143.2  | 0 |
| 1.23 | 6.89  | 3.63 | 9.03   | 5  | 4.3 | 54.3 | 53.9   | 0 |
| 1.08 | 11.79 | 1.66 | 12.15  | 8  | 3.5 | 51.6 | 119.1  | 0 |
| 2.27 | 8.9   | 2.1  | 28.18  | 6  | 3.5 | 49   | 173.6  | 0 |
| 1.33 | 8.34  | 2.3  | 11.55  | 8  | 3.2 | 51.3 | 94.8   | 1 |
| 1.72 | 8.96  | 5.96 | 110.85 | 2  | 2.2 | 47   | 201.8  | 0 |
| 1.89 | 6.79  | 3.78 | 528.79 | 5  | 2.2 | 45.5 | 449.5  | 0 |
| 1.54 | 7.85  | 1.34 | 156.48 | 6  | 4.4 | 52.8 | 173.9  | 1 |
| 1.42 | 7.2   | 2.83 | 200.37 | 6  | 2.4 | 45.5 | 174.4  | 1 |
| 1.45 | 10.12 | 1.13 | 248.67 | 7  | 4.4 | 50.8 | 222.1  | 1 |

|      |       |      |        |   |     |      |       |   |
|------|-------|------|--------|---|-----|------|-------|---|
| 1.64 | 12.14 | 2.6  | 54.7   | 8 | 3.3 | 50.5 | 103.4 | 0 |
| 1.54 | 9.03  | 2.53 | 965.28 | 5 | 2.6 | 46.5 | 685.2 | 0 |
| 1.95 | 5.91  | 0.22 | 322.39 | 7 | 2.8 | 46.7 | 961.6 | 2 |
| 1.5  | 7.2   | 3.76 | 291.18 | 4 | 3.3 | 49   | 498.5 | 1 |
| 1.62 | 6.54  | 2.75 | 193.37 | 7 | 2.9 | 48.5 | 247   | 0 |
| 2.24 | 9.37  | 3.63 | 331    | 6 | 3.1 | 50.3 | 695.7 | 1 |
| 1.97 | 4.12  | 1.66 | 327.18 | 2 | 2.8 | 47.2 | 193.3 | 1 |
| 1.39 | 6.38  | 0.85 | 356.06 | 9 | 3.3 | 52   | 280   | 0 |
| 2.37 | 10.54 | 4.76 | 195.97 | 3 | 3.2 | 48.5 | 487.7 | 0 |

| MUIC_6 | MTg6 | MT3_6 | MT4_6 | MTSH_6 | BMIC_6 | C_sex | C_Wt6 | C_length6 |
|--------|------|-------|-------|--------|--------|-------|-------|-----------|
| 369.1  | 8.5  | 0.68  | 5.19  | 3.15   | 429.92 | 2     | 9.06  | 67        |
| 205.4  | 0.8  | 0.9   | 3.74  | 3.68   | 134.32 | 1     | 6.9   | 62.2      |
| 86.3   | 2.1  | 0.59  | 5.2   | 1.97   | 195.1  | 2     | 7.56  | 64.4      |
| 94.3   | 4.2  | 1.2   | 6.73  | 1.7    | 43.48  | 1     | 7.78  | 63.9      |
| 241.3  | 3.1  | 0.93  | 5.57  | 3.31   | 201.3  | 1     | 8.08  | 68        |
| 91.1   | 4.1  | 1.07  | 6.91  | 1.68   | 54     | 1     | 6.14  | 62.4      |
| 153.9  | 3    | 1.51  | 9.48  | 2.77   | 18.55  | 1     | 7.92  | 64.5      |
| 293.2  | 4.4  | 1.09  | 6.66  | 1.61   | 19.79  | 2     | 7.66  | 65.6      |
| 44.2   | 26.6 | 0.34  | 6.47  | 1.83   | 17.24  | 2     | 7.7   | 64.3      |
| 250.4  | 1.5  | 0.67  | 5.88  | 1      | 29.47  | 1     | 11.38 | 70.3      |
| 204.2  | 6.4  | 0.84  | 4.65  | 2.64   | 40.78  | 1     | 6.12  | 61.4      |
| 154    | 48   | 1.09  | 6.64  | 0.24   | 10.44  | 2     | 8.06  | 63        |
| 107.5  | 7.3  | 1.3   | 5.63  | 0.85   | 8.65   | 1     | 8.5   | 66.8      |
| 436.9  | 25.6 | 1.03  | 8.24  | 1.15   | 40.9   | 1     | 6.86  | 66.7      |
| 62     | 10.4 | 1.33  | 7.56  | 0.88   | 34.3   | 1     | 7.14  | 63.7      |
| 275.4  | 1.6  | 1.27  | 5.75  | 2.83   | 32.65  | 2     | 6.42  | 66        |
| 182.1  | 3.2  | 1.15  | 7.25  | 2.38   | 7.79   | 2     | 5.66  | 58.4      |
| 38.6   | 2.6  | 1.09  | 5.75  | 0.93   | 9.22   | 1     | 7.96  | 66.3      |
| 83     | 22.7 | 1.76  | 7.11  | 0.21   | 14.04  | 2     | 8.48  | 68.5      |
| 115.9  | 10.7 | 1.21  | 4.76  | 0.3    | 20.73  | 2     | 7.58  | 63.2      |
| 235.7  | 1.8  | 0.75  | 8.39  | 3.78   | 261.65 | 2     | 6.4   | 64.9      |
| 153.4  | 3.1  | 1.12  | 6.47  | 0.36   | 138.25 | 1     | 7.58  | 63.5      |
| 130.2  | 3.9  | 1.21  | 9.88  | 2.75   | 178.25 | 2     | 5.46  | 59.6      |
| 146    | 2.3  | 0.48  | 7.76  | 2.06   | 156.03 | 1     | 8.16  | 66.5      |
| 45.9   | 0.7  | 0.72  | 7.89  | 2.34   | 226.59 | 1     | 6.78  | 63.5      |
| 338.3  | 1.5  | 1.12  | 4.63  | 6.24   | 111.64 | 2     | 5.36  | 58.2      |
| 65.9   | 1.4  | 1.69  | 6.32  | 0.3    | 63.84  | 2     | 7.92  | 65.2      |
| 66.9   | 3    | 1.6   | 7.67  | 2.1    | 82.86  | 2     | 6.5   | 61        |
| 104.1  | 5.2  | 0.89  |       | 3.46   | 53.1   | 2     | 6.52  | 63.8      |
| 135.1  | 7    | 1.65  | 6.23  | 0.9    | 54.37  | 2     | 8.04  | 64.1      |
| 196.8  | 5.9  | 1.71  | 8.81  | 3.66   | 105.11 | 2     | 6.46  | 66        |
| 33.3   | 13.8 | 0.86  | 12.08 | 2.68   | 83.7   | 1     | 7.1   | 58.9      |
| 111.3  | 5.5  |       | 7.42  | 1.15   | 276.54 | 2     | 7.82  | 63        |
| 191.4  | 4.1  | 1.22  | 7.96  | 1      | 145.77 | 1     | 5.4   | 61.7      |
| 80.6   | 5.4  | 1.43  | 8     | 0.75   | 228.93 | 1     | 7.16  | 67.3      |
| 118    | 13.9 | 1.26  | 10.22 | 1.17   | 152.13 | 2     | 6.38  | 63.1      |
| 402.3  | 45.4 | 1.2   | 11.17 | 0.98   | 381.87 | 2     | 7.1   | 61.9      |
| 518.4  | 4.8  | 1.43  | 9.48  | 0.36   | 214.94 | 1     | 7.42  | 62.5      |
| 215.1  | 1.3  | 1.65  | 9.54  | 0.95   | 140.06 | 1     | 8.12  | 68.3      |
| 200.3  | 1.5  | 1.15  | 7.59  | 1.32   | 102.92 | 1     | 7.38  | 66.5      |
| 56.2   | 0.7  | 1.15  | 5.64  | 1.63   | 44.19  | 1     | 6.84  | 61.7      |
| 300.2  | 10.4 | 0.96  | 5.25  | 1.25   | 957.73 | 2     | 5.52  | 62.1      |
| 125.5  | 26.9 | 1.4   | 6.68  | 0.24   | 163.62 | 2     | 7.34  | 66.8      |
| 162.3  | 5.8  | 0.58  | 4.24  | 1.1    | 112.65 | 1     | 6.68  | 60.9      |
| 210.6  | 3    | 1.2   | 5.35  | 1.39   | 316.38 | 2     | 5.22  | 57.1      |

|       |       |      |      |      |        |   |      |      |
|-------|-------|------|------|------|--------|---|------|------|
| 192.6 | 1.6   | 1.44 | 5.8  | 0.5  | 249.55 | 1 | 5.02 | 58.1 |
| 75.7  | 0.7   | 1.18 | 4.83 | 1.05 | 41.93  | 2 | 7.82 | 68.6 |
| 96.6  | 14.9  | 2.2  | 8.12 | 0.22 | 166.59 | 2 | 6.44 | 62   |
| 70.7  | 4.2   | 0.87 | 4.96 | 1.13 | 98.86  | 2 | 7.88 | 63.7 |
| 448.9 | 0.6   | 0.87 | 4.98 | 0.61 | 643.05 | 1 | 7.86 | 65   |
| 92.2  | 2.7   | 1.11 | 5.03 | 2.73 | 138.85 | 1 | 7    | 63   |
| 47.2  | 4.9   | 1.26 | 5.91 | 2.34 | 79.83  | 1 | 7.32 | 66.9 |
| 108.8 | 4.6   | 1.14 | 6.01 | 2.57 | 68.5   | 2 | 7.42 | 65.7 |
| 644.9 | 0.9   | 1.56 | 6.64 | 1.52 | 385.1  | 1 | 6.08 | 63   |
| 126.3 | 1.9   | 1.16 | 4.95 | 0.59 | 152.43 | 1 | 8.2  | 69   |
| 162.7 | 3.4   | 1.25 | 5.75 | 0.69 | 38.19  | 1 | 7.3  | 65.3 |
| 85.7  | 10.3  | 0.73 | 4.16 | 1.95 | 116.96 | 2 | 6.44 | 60.5 |
| 354.7 | 6.9   | 1.51 | 4.54 | 1.26 | 133.12 | 2 | 6.64 | 65.7 |
| 162.5 | 9.9   | 1.45 | 5.15 | 1.23 | 77.48  | 2 | 6.46 | 64   |
| 274.5 | 1.1   | 1.29 | 4.75 | 1.83 | 362.28 | 2 | 5.1  | 61.3 |
| 294.4 | 0     | 1.3  | 5.06 | 0.92 | 257.57 | 1 | 7.1  | 67.7 |
| 203.9 | 4.3   | 1.92 | 5.56 | 0.41 | 234.3  | 2 | 6.6  | 63   |
| 189.2 | 36.5  | 0.77 | 5.38 | 1.08 | 77.42  | 2 | 7.22 | 63.2 |
| 174   | 3.5   | 1.41 | 5.49 | 1.1  | 316.83 | 2 | 5.16 | 58.5 |
| 46.5  | 1.8   | 1.5  | 5.49 | 1.65 | 189.01 | 2 | 7.2  | 63   |
| 90    | 7.2   | 2.16 | 9.47 | 1.15 | 212.5  | 2 | 6.32 | 60.8 |
| 228.6 | 20.3  | 1.33 | 7.04 | 0.81 | 156.68 | 1 | 7.5  | 62.6 |
| 234.1 | 8.1   | 0.87 | 5.16 | 2.05 | 129.28 | 1 | 7.7  | 64.7 |
| 190.7 | 4.9   | 1.36 | 7.69 | 0.2  | 76.5   | 2 | 5.58 | 64   |
| 129.6 | 2.9   | 1.55 | 9.57 | 0.44 | 47.07  | 1 | 7.82 | 67.5 |
| 428   | 7.8   | 0.88 | 5.45 | 2.11 | 145.5  | 1 | 7.5  | 65.2 |
| 87.4  | 4.2   | 0.75 | 4.85 | 2.07 | 335.26 | 1 | 6.36 | 60.4 |
| 50    | 4.7   | 2.11 | 7.21 | 1.82 | 180.38 | 1 | 7.98 | 65.2 |
| 295.2 | 28.8  | 1.79 | 7.77 | 1.02 | 335.63 | 2 | 7.14 | 64.7 |
| 77.4  | 15.4  | 0.99 | 6.85 | 0.68 | 53.24  | 2 | 7.32 | 62   |
| 68.1  | 0.9   | 1.73 | 5.21 | 1.28 | 111.13 | 1 | 6.1  | 62.6 |
| 604.4 | 12.1  | 1.62 | 8.96 | 0.46 | 178.76 | 1 | 7.04 | 62.8 |
| 92.2  | 5.4   | 1.53 | 7.51 | 1.18 | 143.1  | 1 | 7.5  | 65.5 |
| 45.5  | 151.7 | 1.21 | 4.34 | 0.08 | 245.18 | 2 | 6.5  | 58.3 |
| 84.6  | 4.8   | 1.14 | 5.63 | 1.71 | 278.21 | 1 | 6.7  | 64.3 |
| 100   | 0.7   | 0.62 | 2.78 | 4.01 | 7.85   | 1 | 9.32 | 68   |
| 73    | 2.2   | 0.52 | 3.31 | 1.56 | 10.52  | 2 | 8.38 | 64.6 |
| 216.2 | 3.7   | 0.52 | 3.83 | 2.44 | 13.4   | 1 | 9.48 | 66.1 |
| 94.2  | 2.2   | 0.91 | 5.36 | 2.74 | 18.14  | 1 | 7.32 | 66.8 |
| 190.7 | 18.7  | 0.77 | 6.96 | 0.71 | 19.31  | 2 | 6.32 | 61   |
| 110   | 2.1   | 1.36 | 5.39 | 0.77 | 15.44  | 2 | 6.46 | 62.5 |
| 353.8 | 0.9   | 1.2  | 5.17 | 2.83 | 34     | 2 | 6.74 | 63.3 |
| 61    | 8.1   | 1.19 | 4.36 | 1.11 | 53.32  | 1 | 6.24 | 61.5 |
| 157.7 | 2.2   | 1.02 | 3.52 | 0.66 | 12.75  | 2 | 6.52 | 59.5 |
| 51.9  | 2.8   | 0.97 | 4.31 | 0.33 | 10.47  | 1 | 9.36 | 66.5 |
| 47    | 3.6   | 1.4  | 6.03 | 1.41 | 3.68   | 2 | 7.58 | 58.2 |
| 162.9 | 1     | 0.96 | 8.07 | 0.53 | 17     | 2 | 8.34 | 61.5 |



|       |       |      |      |      |        |   |      |      |
|-------|-------|------|------|------|--------|---|------|------|
| 72.4  | 6.9   | 1.2  | 5.11 | 1    | 15.61  | 2 | 7.44 | 62.5 |
| 158.3 | 3.5   | 1.01 | 7.22 | 0.85 | 15.03  | 2 | 8.32 | 62.7 |
| 85.4  | 121.2 | 1.45 | 3.85 | 0.09 | 89.05  | 2 | 6.82 | 63.2 |
| 56.7  | 7.6   | 1.33 | 3.88 | 0.69 | 71.2   | 1 | 7.54 | 63.5 |
| 79.8  | 1.5   | 1.21 | 5.7  | 1.75 | 98.29  | 2 | 7.56 | 64.5 |
| 29.6  | 74.2  | 2.05 | 8.8  | 1.07 | 134.48 | 1 | 6.18 | 62.6 |
| 138.7 | 3.2   | 1.59 | 5.08 | 0.02 | 208.68 | 1 | 7.14 | 63.2 |
| 38    | 1.3   | 0.63 | 3.42 | 0.57 | 228.78 | 1 | 6.54 | 61.8 |
| 191.1 | 1.7   | 1.32 | 5.89 | 1.13 | 202.38 | 1 | 7.16 | 61.5 |

| CUIC_6 | C_TSH6 | C_T4_6 | HFIAS | Tot_Nov_Q | Tot_shift | Num_looks | Ave_look |
|--------|--------|--------|-------|-----------|-----------|-----------|----------|
| 535.9  | 1.14   | 12.95  | 1     | 0.59      | 5         | 7         | 3.93     |
| 292.9  | 0.1    | 7.45   | 2     | 0.72      | 6         | 10        | 11.14    |
| 374.1  | 0.75   | 11.08  | 1     | 0.49      | 5         | 4         | 13.1     |
| 244.6  | 1.01   | 8.47   | 1     | 0.41      | 5         | 4         | 17.85    |
| 309.4  | 0.36   | 8.09   | 1     | 0.47      | 1         | 5         | 10.52    |
| 103.3  | 0.36   | 11.27  | 3     | 0.63      | 2         | 6         | 11.48    |
| 312.1  | 0.1    | 19.9   | 3     | 0.88      | 3         | 9         | 6.87     |
| 120.7  | 0.62   | 18.35  | 3     | 0.29      | 5         | 8         | 5.56     |
| 257.2  | 0.1    | 17.81  | 4     | 0.45      | 3         | 5         | 2.66     |
| 615.7  | 0.1    | 14.31  | 3     | 0.34      | 5         | 6         | 5.94     |
| 384.3  | 0.62   | 10.31  | 4     | 0.32      | 6         | 8         | 3.74     |
| 151.9  | 2.95   | 15.11  | 1     | 0.34      | 3         | 6         | 5.91     |
| 305.8  | 1.66   | 7.61   | 1     | 0.63      | 5         | 6         | 10.66    |
| 734.4  | 2.18   | 14.4   | 3     | 0.35      | 9         | 7         | 17.33    |
| 364    | 2.82   | 7.94   | 1     | 0.36      | 4         | 6         | 6.77     |
| 616    | 1.66   | 18.6   | 2     | 0.76      | 5         | 5         | 9.08     |
| 101.5  | 2.31   | 19.9   | 1     | 0.24      | 3         | 7         | 9.64     |
| 144.1  | 0.1    | 9.9    | 2     | 0.54      | 2         | 4         | 6.13     |
| 105.8  | 0.75   | 10.39  | 1     | 0.41      | 1         | 9         | 6.28     |
| 271    | 0.23   | 9.06   | 1     | 0.41      | 6         | 7         | 3.04     |
| 172.8  | 2.95   | 13.35  | 2     | 0.5       | 0         | 4         | 16.53    |
| 492.8  | 1.27   | 9.2    | 1     | 0.54      | 7         | 5         | 8.01     |
| 610.9  | 0.1    | 8.02   | 4     | 0.74      | 3         | 7         | 13.96    |
| 133    | 0.1    | 8.47   | 1     | 0.49      | 5         | 6         | 12.37    |
| 236.6  | 0.1    | 8.18   | 3     | 0.56      | 10        | 5         | 10.12    |
| 103.3  | 1.66   | 16.16  | 1     | 0.43      | 10        | 8         | 6.52     |
| 72.4   | 0.1    | 19.8   | 1     | 0.18      | 1         | 5         | 26.03    |
| 81.4   | 1.01   | 9.37   | 1     | 0.16      | 2         | 5         | 8.92     |
| 65.6   | 0.1    | 8.84   | 1     | 0.26      | 1         | 7         | 9.86     |
| 63.3   | 0.62   | 9.88   | 3     | 0.5       | 4         | 7         | 19.09    |
| 143.4  | 1.79   | 11.2   | 1     | 0.34      | 3         | 7         | 25.67    |
| 284.6  | 0.36   | 7.91   | 1     | 0.63      | 6         | 9         | 4.34     |
| 193    | 0.23   | 12.33  | 1     | 0.47      | 8         | 6         | 14.63    |
| 105.1  | 0.1    | 13.39  | 1     | 0.46      | 4         | 4         | 5.23     |
| 272.7  | 1.01   | 11.43  | 1     | 0.45      | 9         | 5         | 7.51     |
| 451.8  | 0.49   | 10.66  | 1     | 0.45      | 3         | 13        | 3.01     |
| 650.2  | 2.05   | 9.15   | 1     | 0.37      | 2         | 4         | 14.09    |
| 544.9  | 0.1    | 7.61   | 1     | 1         | 0         | 4         | 11.48    |
| 250.1  | 0.23   | 10.35  | 3     | 0.3       | 7         | 8         | 5.84     |
| 221    | 2.82   | 11.1   | 4     | 0.48      | 2         | 4         | 21.54    |
| 103.1  | 0.1    | 13.28  | 1     | 0.65      | 3         | 5         | 7.35     |
| 453.9  | 0.36   | 10.89  | 1     | 0.47      | 9         | 4         | 2.25     |
| 183.5  | 0.88   | 20.2   | 1     | 0.66      | 8         | 6         | 9.26     |
| 164.8  | 1.14   | 15.89  | 3     | 0.52      | 2         | 5         | 2.42     |
| 391.9  | 0.23   | 10.57  | 3     | 0.43      | 4         | 6         | 16.66    |

|       |       |       |   |      |   |    |       |
|-------|-------|-------|---|------|---|----|-------|
| 423.1 | 0.1   | 7.88  | 3 | 0.52 | 5 | 6  | 9.46  |
| 114.2 | 0.23  | 8.48  | 1 | 0.36 | 5 | 8  | 2.1   |
| 271   | 2.05  | 11.1  | 2 | 0.59 | 1 | 6  | 2.89  |
| 174.6 | 0.1   | 13.31 | 3 | 0.18 | 4 | 5  | 8.48  |
| 584.2 | 4.23  | 10.26 | 3 | 0.35 | 4 | 5  | 6.06  |
| 175.5 | 0.1   | 7.8   | 1 | 0.47 | 8 | 4  | 8.16  |
| 273.4 | 9.9   | 21.12 | 1 | 0.47 | 8 | 6  | 2.97  |
| 94.8  | 2.05  | 10.28 | 4 | 0.05 | 1 | 4  | 19.54 |
| 436.1 | 0.88  | 8.18  | 2 | 0.77 | 1 | 6  | 3.38  |
| 145.3 | 0.75  | 10.2  | 4 | 0.5  | 0 | 6  | 4.72  |
| 39.8  | 0.1   | 20.7  | 1 | 0.39 | 5 | 4  | 4.94  |
| 170.2 | 0.1   | 10.63 | 3 | 0.66 | 4 | 7  | 17.17 |
| 136.2 | 1.66  | 12.36 | 2 | 0.39 | 1 | 7  | 6.71  |
| 69.8  | 0.1   | 8.42  | 1 | 0.48 | 7 | 10 | 5.05  |
| 869.2 | 0.62  | 11.67 | 3 | 0.55 | 6 | 4  | 7.17  |
| 250.8 | 0.88  | 20.5  | 2 | 0.7  | 2 | 6  | 9.68  |
| 233.1 | 1.14  | 12.06 | 1 | 0.76 | 4 | 8  | 4.91  |
| 356.2 | 0.49  | 11.64 | 3 | 0.36 | 6 | 5  | 6.64  |
| 275.7 | 1.66  | 7.8   | 1 | 0.45 | 6 | 10 | 2.6   |
| 82.5  | 0.1   | 10.89 | 1 | 0.45 | 4 | 6  | 13.73 |
| 571.4 | 0.1   | 9.57  | 1 | 0.74 | 2 | 4  | 9.09  |
| 398.7 | 1.4   | 9.55  | 1 | 0.33 | 7 | 9  | 6.79  |
| 221.8 | 3.46  | 27.4  | 3 | 0.17 | 4 | 6  | 10.28 |
| 282.2 | 0.23  | 14.36 | 1 | 0.5  | 0 | 7  | 4.01  |
| 47.6  | 0.1   | 14.5  | 3 | 0.52 | 7 | 4  | 8.89  |
| 439.7 | 1.14  | 17.6  | 4 | 0.73 | 2 | 9  | 9     |
| 851.5 | 0.1   | 9.53  | 1 | 0.56 | 5 | 7  | 8.57  |
| 806.7 | 0.49  | 12.03 | 1 | 0.31 | 5 | 6  | 11.55 |
| 208.8 | 0.88  | 15.83 | 3 | 0.74 | 8 | 8  | 5.9   |
| 169.3 | 0.49  | 9.29  | 1 | 0.47 | 6 | 15 | 4.97  |
| 138.4 | 1.53  | 14.04 | 1 | 0.64 | 1 | 4  | 9.57  |
| 297.5 | 0.88  | 20.7  | 1 | 0.72 | 4 | 7  | 9.31  |
| 218.1 | 0.1   | 7.07  | 2 | 0.56 | 7 | 7  | 23.08 |
| 806.7 | 0.12  | 14.33 | 1 | 0.09 | 1 | 8  | 2.58  |
| 850.1 | 0.89  | 19.31 | 1 | 0.83 | 4 | 16 | 5.91  |
| 68.4  | 0.12  | 16.65 | 4 | 0.65 | 4 | 4  | 4.03  |
| 38.5  | 0.13  | 10.13 | 1 | 0.6  | 5 | 7  | 5     |
| 188.4 | 6.08  | 17.31 | 2 | 0.65 | 4 | 8  | 9.99  |
| 351.6 | 0.12  | 15.51 | 1 | 0.66 | 3 | 6  | 5.91  |
| 148.6 | 0.7   | 12.77 | 1 | 0.89 | 3 | 10 | 4.24  |
| 129.2 | 17.95 | 15.4  | 1 | 0.38 | 6 | 7  | 7.03  |
| 146   | 0.7   | 13.95 | 4 | 0.87 | 1 | 6  | 25.37 |
| 78.6  | 0.14  | 17.13 | 1 | 0.58 | 5 | 6  | 6.51  |
| 524.2 | 0.51  | 20.77 | 1 | 0.66 | 5 | 22 | 1.63  |
| 108.4 | 1.36  | 26.06 | 1 | 0.27 | 8 | 4  | 10.78 |
| 63.1  | 0.13  | 11.53 | 1 | 0.46 | 2 | 5  | 5.61  |
| 84.8  | 0.13  | 11.79 | 1 | 0.47 | 7 | 5  | 4.54  |

|       |      |       |   |      |    |    |       |
|-------|------|-------|---|------|----|----|-------|
| 252.5 | 0.13 | 10.56 | 1 | 0.34 | 4  | 12 | 5.8   |
| 360.9 | 1.55 | 19.63 | 2 | 0.67 | 10 | 7  | 5.98  |
| 82.3  | 7.6  | 24.84 | 1 | 0.37 | 5  | 12 | 2.31  |
| 194.5 | 0.13 | 12.68 | 1 | 0.76 | 5  | 4  | 3.71  |
| 113.9 | 0.13 | 23.28 | 4 | 0.41 | 3  | 4  | 5.7   |
| 59.7  | 0.33 | 16.2  | 2 | 0.6  | 4  | 6  | 9.02  |
| 299.5 | 0.13 | 12.11 | 4 | 0.96 | 1  | 11 | 14.83 |
| 245.1 | 0.89 | 18    | 3 | 0.58 | 4  | 6  | 4.87  |
| 161.4 | 1.27 | 15.71 | 1 | 0.38 | 7  | 7  | 20.06 |

Long\_look W\_edu

|       |   |
|-------|---|
| 9.97  | 2 |
| 34.02 | 4 |
| 36.54 | 3 |
| 31.97 | 2 |
| 19.96 | 4 |
| 37.24 | 4 |
| 18.09 | 2 |
| 9.56  | 2 |
| 5.43  | 1 |
| 11.1  | 1 |
| 9.5   | 2 |
| 11.07 | 2 |
| 29.1  | 2 |
| 30.68 | 6 |
| 12.48 | 1 |
| 19.3  | 1 |
| 19.98 | 3 |
| 16.19 | 3 |
| 14.34 | 3 |
| 5.03  | 1 |
| 41.5  | 2 |
| 15.29 | 1 |
| 35.56 | 2 |
| 34.82 | 3 |
| 30.08 | 3 |
| 9.25  | 2 |
| 107.8 | 1 |
| 19.24 | 3 |
| 27.82 | 3 |
| 44.59 | 5 |
| 54.14 | 1 |
| 8.27  | 3 |
| 34.93 | 4 |
| 13.21 | 2 |
| 15.21 | 2 |
| 8.13  | 1 |
| 22.09 | 3 |
| 20.99 | 2 |
| 15.96 | 1 |
| 55.89 | 1 |
| 14.5  | 6 |
| 4.18  | 3 |
| 18.87 | 2 |
| 5.02  | 3 |
| 30.75 | 1 |

|        |   |
|--------|---|
| 20.34  | 1 |
| 3.69   | 5 |
| 5.48   | 3 |
| 17.34  | 1 |
| 11     | 1 |
| 17.14  | 1 |
| 4.91   | 1 |
| 61.63  | 1 |
| 6.63   | 1 |
| 8.41   | 1 |
| 12.83  | 1 |
| 57.38  | 2 |
| 19.43  | 1 |
| 9.83   | 1 |
| 12.78  | 1 |
| 20.25  | 1 |
| 11.57  | 2 |
| 14.97  | 6 |
| 4.1    | 3 |
| 19.59  | 2 |
| 20.89  | 2 |
| 12.67  | 4 |
| 18.79  | 1 |
| 7.43   | 2 |
| 22.68  | 1 |
| 16.03  | 2 |
| 22.92  | 1 |
| 19.02  | 2 |
| 11.84  | 2 |
| 10.46  | 6 |
| 21.52  | 3 |
| 17.66  | 3 |
| 73.93  | 1 |
| 6.35   | 1 |
| 11.37  | 6 |
| 8.11   | 1 |
| 9.31   | 4 |
| 19.73  | 2 |
| 12.98  | 4 |
| 8.04   | 3 |
| 17.95  | 3 |
| 105.02 | 3 |
| 11.38  | 1 |
| 2.97   | 3 |
| 34.69  | 1 |
| 17.95  | 1 |
| 11.18  | 1 |

|       |   |
|-------|---|
| 11.12 | 6 |
| 12.18 | 1 |
| 3.52  | 3 |
| 8.66  | 6 |
| 9.55  | 3 |
| 19.57 | 4 |
| 43.73 | 1 |
| 8.02  | 1 |
| 46.02 | 6 |
